# Supplementary material for: A Comparison of the Psycholinguistic Styles of Schizophrenia-Related Stigma and Depression-Related Stigma on Social Media: Content Analysis
Source: PubMed Central journal article supplement (PMC7201321; doi:10.2196/16470), 2020-04-21
Supplement: jmir_v22i4e16470_app1.pdf [file jmir_v22i4e16470_app1.pdf]

Multimedia Appendix 1. Coding framework for schizophrenia-related stigma.

| Subcategory                                                                                         | Definition                                                                                 | Representative Weibo post                                                                                                                               | Posts, n (%) |
|-----------------------------------------------------------------------------------------------------|--------------------------------------------------------------------------------------------|---------------------------------------------------------------------------------------------------------------------------------------------------------|--------------|
| It is best to avoid people with schizophrenia so that you do not become vulnerable to schizophrenia | Beliefs that schizophrenia is an infectious disease                                        | "It is said that schizophrenia is highly infectious..." ["传说精神分裂症的传染力很强..."]                                                                            | 26 (0.52)    |
| Schizophrenia is a sign of personal weakness                                                        | Beliefs that people with schizophrenia show a lack of strength and cannot sustain pressure | "...A mentally weak person is so vulnerable to schizophrenia..." ["...很容易得精神分裂症的，特别是玻璃心的孩纸们..."]                                                        | 39 (0.77)    |
| People with schizophrenia are dangerous                                                             | Beliefs that people with schizophrenia are likely to cause harm or injury                  | "When you need to talk to a person with schizophrenia, it is very important to pay attention to your safety!" ["采访严重精神分裂症患者要注意自身安全！"]                   | 1354 (26.86) |
| People with schizophrenia are unpredictable                                                         | Beliefs that people with schizophrenia behave in a way that cannot be not easily predicted | "People with schizophrenia can suddenly turn crying into laughing (still with snots and tears of sadness) ..." ["精神分裂症病人，这一秒哭个不停，下一秒又傻笑出声（鼻涕眼泪还挂着）..."] | 2074 (41.14) |
| Schizophrenia is not a real medical illness                                                         | Beliefs that schizophrenia is a                                                            | "Schizophrenia is really just an excuse to                                                                                                              | 21 (0.42)    |

|                                                               |                                                                                                      |                                                                                                                     |             |
|---------------------------------------------------------------|------------------------------------------------------------------------------------------------------|---------------------------------------------------------------------------------------------------------------------|-------------|
|                                                               | made up, rather than a medical disease                                                               | get a lesser sentence or to get out of prison" ["精神分裂症真是万能的脱罪藉口"]                                                   |             |
| People with schizophrenia could snap out of it if they wanted | Beliefs that people with schizophrenia can recover from their illness at will                        | "As you pray to the Buddha, your schizophrenia will be recovered soon ..." ["唱念观世音菩萨圣号治愈严重精神分裂症..."]                | 13 (0.26)   |
| People would not tell anyone if they had schizophrenia        | Beliefs that people should be ashamed of their own schizophrenia                                     | "...Schizophrenia is God's punishment for family sins..." ["...患精神分裂症，原来是祖上有杀业灵性所致..."]                             | 115 (2.28)  |
| People with schizophrenia are glorified                       | Beliefs that schizophrenia is a sign of noble souls or a quality of being graceful                   | "I think those with schizophrenia are charming..." ["从来没觉得精神分裂症有这么迷人过..."]                                          | 281 (5.57)  |
| People with schizophrenia are self-centered                   | Beliefs that people with schizophrenia only think of their own advantage                             | "...Schizophrenia is the same as narcissism." ["...自恋狂、精神分裂症...是同一类人。"]                                             | 48 (0.95)   |
| People with schizophrenia are weird                           | Beliefs that people with schizophrenia behave in an unsettling way that is strikingly odd or unusual | "...Someone is throwing money like paper towels. Could this person have schizophrenia?" ["...把钱当手纸丢了，这人不会得精神分裂症吧？"] | 929 (18.43) |

|                                      |                                                            |                                                              |            |
|--------------------------------------|------------------------------------------------------------|--------------------------------------------------------------|------------|
| People with schizophrenia are stupid | Beliefs that people with schizophrenia are silly or unwise | "The schizophrenia patients, the idiot people" ["傻逼精神分裂症患者"] | 141 (2.80) |
|--------------------------------------|------------------------------------------------------------|--------------------------------------------------------------|------------|
