# Supplementary material for: A Comparison of the Psycholinguistic Styles of Schizophrenia-Related Stigma and Depression-Related Stigma on Social Media: Content Analysis
Source: PubMed Central journal article supplement (PMC7201321; doi:10.2196/16470), 2020-04-21
Supplement: jmir_v22i4e16470_app2.pdf [file jmir_v22i4e16470_app2.pdf]

Multimedia Appendix 2. Key features selected for data modeling.

| Comparisons                                                                       | Features                          | Example words | <i>t</i> | <i>df</i> | <i>P</i> value | Cohen <i>d</i> |
|-----------------------------------------------------------------------------------|-----------------------------------|---------------|----------|-----------|----------------|----------------|
| Schizophrenia-related stigma<br>vs<br>Nonstigma                                   | Social processes                  | mate          | 18.43    | 10080     | <.001          | 0.37           |
|                                                                                   | Time                              | until         | 17.85    | 10080     | <.001          | 0.36           |
|                                                                                   | Adverbs                           | very          | 17.50    | 10080     | <.001          | 0.35           |
|                                                                                   | Humans                            | adult         | 16.12    | 10080     | <.001          | 0.32           |
|                                                                                   | Total function words              | /             | 15.89    | 10080     | <.001          | 0.32           |
|                                                                                   | Signal words for present tense    | often         | 14.44    | 10080     | <.001          | 0.29           |
|                                                                                   | Death                             | kill          | 13.79    | 10080     | <.001          | 0.28           |
|                                                                                   | First pers plural                 | we            | 13.38    | 10080     | <.001          | 0.27           |
|                                                                                   | Conjunctions                      | but           | 13.38    | 10080     | <.001          | 0.27           |
|                                                                                   | Relativity                        | stop          | 12.81    | 10080     | <.001          | 0.26           |
|                                                                                   | Word count                        | /             | 12.56    | 10080     | <.001          | 0.25           |
|                                                                                   | Signal words for tenses           | already       | 11.81    | 10080     | <.001          | 0.24           |
|                                                                                   | Anger                             | hate          | 11.22    | 10080     | <.001          | 0.22           |
| Unpredictable stigma (schizophrenia)<br>vs<br>Other subcategories (schizophrenia) | Personal pronouns                 | them          | 21.23    | 4146      | <.001          | 0.66           |
|                                                                                   | First pers singular               | me            | 19.51    | 4146      | <.001          | 0.61           |
|                                                                                   | Total function words              | /             | 17.83    | 4146      | <.001          | 0.55           |
|                                                                                   | Signal words for tenses           | already       | 17.36    | 4146      | <.001          | 0.54           |
|                                                                                   | Signal words for continuous tense | yet           | 15.35    | 4146      | <.001          | 0.48           |
|                                                                                   | First pers plural                 | we            | 14.68    | 4146      | <.001          | 0.46           |
|                                                                                   | Adverbs                           | very          | 14.46    | 4146      | <.001          | 0.45           |
|                                                                                   | Signal words for present tense    | often         | 13.93    | 4146      | <.001          | 0.43           |
|                                                                                   | Signal words for past tense       | ago           | 13.01    | 4146      | <.001          | 0.40           |
|                                                                                   | Religion                          | altar         | 11.08    | 4146      | <.001          | 0.34           |
|                                                                                   | Assent                            | agree         | 11.00    | 4146      | <.001          | 0.34           |
|                                                                                   | Time                              | until         | 10.80    | 4146      | <.001          | 0.34           |
|                                                                                   | Conjunctions                      | but           | 10.56    | 4146      | <.001          | 0.33           |
|                                                                                   | Total pronouns                    | itself        | 10.24    | 4146      | <.001          | 0.32           |
| Positive emotion                                                                  | love                              | 10.05         | 4146     | <.001     | 0.31           |                |

|                                                                                     |                                |          |        |       |       |       |
|-------------------------------------------------------------------------------------|--------------------------------|----------|--------|-------|-------|-------|
|                                                                                     | Cognitive processes            | ought    | 9.89   | 4146  | <.001 | 0.31  |
|                                                                                     | Inclusive                      | with     | 9.28   | 4146  | <.001 | 0.29  |
|                                                                                     | Auxiliary verbs                | will     | 7.33   | 4146  | <.001 | 0.23  |
|                                                                                     | Third pers singular            | she      | -7.09  | 4146  | <.001 | -0.22 |
|                                                                                     | Impersonal pronouns            | it       | -7.33  | 4146  | <.001 | -0.23 |
|                                                                                     | Space                          | down     | -7.74  | 4146  | <.001 | -0.24 |
|                                                                                     | Biological processes           | pain     | -8.38  | 4146  | <.001 | -0.26 |
|                                                                                     | Body                           | hand     | -8.77  | 4146  | <.001 | -0.27 |
|                                                                                     | Family                         | daughter | -8.82  | 4146  | <.001 | -0.27 |
|                                                                                     | Work                           | job      | -8.84  | 4146  | <.001 | -0.27 |
|                                                                                     | Word count                     | /        | -8.92  | 4146  | <.001 | -0.28 |
|                                                                                     | Motion                         | arrive   | -9.12  | 4146  | <.001 | -0.28 |
|                                                                                     | Death                          | kill     | -14.07 | 4146  | <.001 | -0.44 |
| Dangerous stigma<br>(schizophrenia)<br>vs<br>Other subcategories<br>(schizophrenia) | Death                          | kill     | 10.71  | 2706  | <.001 | 0.41  |
|                                                                                     | Family                         | daughter | 10.04  | 2706  | <.001 | 0.39  |
|                                                                                     | Work                           | job      | 8.12   | 2706  | <.001 | 0.31  |
|                                                                                     | Third pers singular            | she      | 6.49   | 2706  | <.001 | 0.25  |
|                                                                                     | Biological processes           | pain     | 6.31   | 2706  | <.001 | 0.24  |
|                                                                                     | Health                         | clinic   | 6.14   | 2706  | <.001 | 0.24  |
|                                                                                     | Humans                         | adult    | 5.57   | 2706  | <.001 | 0.21  |
|                                                                                     | Fillers                        | I mean   | -5.82  | 2706  | <.001 | -0.22 |
|                                                                                     | Second pers singular           | you      | -6.00  | 2706  | <.001 | -0.23 |
|                                                                                     | Auxiliary verbs                | will     | -6.19  | 2706  | <.001 | -0.24 |
|                                                                                     | Common verbs                   | walk     | -7.57  | 2706  | <.001 | -0.29 |
|                                                                                     | Religion                       | altar    | -7.67  | 2706  | <.001 | -0.29 |
|                                                                                     | Signal words for past tense    | ago      | -8.33  | 2706  | <.001 | -0.32 |
|                                                                                     | Conjunctions                   | but      | -8.39  | 2706  | <.001 | -0.32 |
|                                                                                     | Inclusive                      | with     | -8.43  | 2706  | <.001 | -0.32 |
|                                                                                     | Signal words for present tense | often    | -8.53  | 2706  | <.001 | -0.33 |
|                                                                                     | Positive emotion               | love     | -8.78  | 2706  | <.001 | -0.34 |
|                                                                                     | First pers plural              | we       | -9.36  | 2706  | <.001 | -0.36 |
|                                                                                     | Cognitive processes            | ought    | -10.94 | 2706  | <.001 | -0.42 |
|                                                                                     | Assent                         | agree    | -11.08 | 2706  | <.001 | -0.43 |
| Signal words for tenses                                                             | already                        | -11.29   | 2706   | <.001 | -0.43 |       |

|                                                           |                                   |          |        |       |       |       |
|-----------------------------------------------------------|-----------------------------------|----------|--------|-------|-------|-------|
|                                                           | Signal words for continuous tense | yet      | -11.36 | 2706  | <.001 | -0.44 |
|                                                           | Total pronouns                    | itself   | -11.82 | 2706  | <.001 | -0.45 |
|                                                           | Adverbs                           | very     | -12.13 | 2706  | <.001 | -0.47 |
|                                                           | First pers singular               | me       | -14.33 | 2706  | <.001 | -0.55 |
|                                                           | Personal pronouns                 | them     | -14.57 | 2706  | <.001 | -0.56 |
|                                                           | Total function words              | /        | -18.51 | 2706  | <.001 | -0.71 |
| Depression-related stigma vs Schizophrenia-related stigma | Auxiliary verbs                   | will     | 15.59  | 1932  | <.001 | 0.71  |
|                                                           | Discrepancy                       | should   | 14.14  | 1932  | <.001 | 0.64  |
|                                                           | Cognitive processes               | ought    | 13.54  | 1932  | <.001 | 0.62  |
|                                                           | Quantifiers                       | few      | 13.41  | 1932  | <.001 | 0.61  |
|                                                           | Tentative                         | maybe    | 12.76  | 1932  | <.001 | 0.58  |
|                                                           | Negative emotion                  | hurt     | 11.12  | 1932  | <.001 | 0.51  |
|                                                           | Affective processes               | abandon  | 10.91  | 1932  | <.001 | 0.50  |
|                                                           | Conjunctions                      | but      | 10.36  | 1932  | <.001 | 0.47  |
|                                                           | Time                              | until    | 8.59   | 1932  | <.001 | 0.39  |
|                                                           | Inclusive                         | with     | 7.75   | 1932  | <.001 | 0.35  |
|                                                           | Second pers singular              | you      | 7.18   | 1932  | <.001 | 0.33  |
|                                                           | Sad                               | crying   | 6.30   | 1932  | <.001 | 0.29  |
|                                                           | Prepositions                      | to       | 5.79   | 1932  | <.001 | 0.26  |
|                                                           | Adverbs                           | very     | 5.48   | 1932  | <.001 | 0.25  |
|                                                           | Total pronouns                    | itself   | -4.69  | 1932  | <.001 | -0.21 |
|                                                           | Words per sentence                | /        | -4.53  | 1932  | <.001 | -0.21 |
|                                                           | Family                            | daughter | -4.77  | 1932  | <.001 | -0.22 |
|                                                           | Signal words for present tense    | often    | -5.08  | 1932  | <.001 | -0.23 |
|                                                           | Humans                            | adult    | -5.08  | 1932  | <.001 | -0.23 |
|                                                           | Positive emotion                  | love     | -5.07  | 1932  | <.001 | -0.23 |
|                                                           | Sexual                            | horny    | -5.00  | 1932  | <.001 | -0.23 |
|                                                           | Motion                            | arrive   | -5.18  | 1932  | <.001 | -0.24 |
|                                                           | Insight                           | think    | -5.48  | 1932  | <.001 | -0.25 |
|                                                           | Work                              | job      | -6.08  | 1932  | <.001 | -0.28 |
|                                                           | Religion                          | altar    | -6.50  | 1932  | <.001 | -0.30 |
|                                                           | First pers plural                 | we       | -6.83  | 1932  | <.001 | -0.31 |
| Signal words for past tense                               | ago                               | -6.75    | 1932   | <.001 | -0.31 |       |
| Numbers                                                   | second                            | -7.09    | 1932   | <.001 | -0.32 |       |

|                                                                                       |                                      |           |       |       |       |       |
|---------------------------------------------------------------------------------------|--------------------------------------|-----------|-------|-------|-------|-------|
|                                                                                       | First pers singular                  | me        | -7.80 | 1932  | <.001 | -0.35 |
|                                                                                       | Space                                | down      | -9.82 | 1932  | <.001 | -0.45 |
| Unpredictable stigma<br>(depression)<br>vs<br>Unpredictable stigma<br>(schizophrenia) | Discrepancy                          | should    | 23.02 | 758   | <.001 | 1.67  |
|                                                                                       | Quantifiers                          | few       | 21.64 | 758   | <.001 | 1.57  |
|                                                                                       | Cognitive processes                  | ought     | 19.57 | 758   | <.001 | 1.42  |
|                                                                                       | Tentative                            | maybe     | 18.45 | 758   | <.001 | 1.34  |
|                                                                                       | Auxiliary verbs                      | will      | 15.68 | 758   | <.001 | 1.14  |
|                                                                                       | Negative emotion                     | hurt      | 15.40 | 758   | <.001 | 1.12  |
|                                                                                       | Affective processes                  | abandon   | 14.79 | 758   | <.001 | 1.07  |
|                                                                                       | Time                                 | until     | 14.61 | 758   | <.001 | 1.06  |
|                                                                                       | Conjunctions                         | but       | 12.54 | 758   | <.001 | 0.91  |
|                                                                                       | Prepositions                         | to        | 11.73 | 758   | <.001 | 0.85  |
|                                                                                       | Inclusive                            | with      | 9.70  | 758   | <.001 | 0.70  |
|                                                                                       | Signal words for<br>continuous tense | yet       | 7.91  | 758   | <.001 | 0.57  |
|                                                                                       | Relativity                           | stop      | 3.87  | 758   | <.001 | 0.28  |
|                                                                                       | Negations                            | never     | -3.37 | 758   | .001  | -0.24 |
|                                                                                       | Sexual                               | horny     | -3.28 | 758   | .001  | -0.24 |
|                                                                                       | Home                                 | apartment | -3.34 | 758   | .001  | -0.24 |
|                                                                                       | Swear                                | damn      | -3.61 | 758   | <.001 | -0.26 |
|                                                                                       | Ingestion                            | eat       | -3.57 | 758   | <.001 | -0.26 |
|                                                                                       | Common verbs                         | walk      | -3.68 | 758   | <.001 | -0.27 |
|                                                                                       | Family                               | daughter  | -3.76 | 758   | <.001 | -0.27 |
|                                                                                       | See                                  | view      | -3.94 | 758   | <.001 | -0.29 |
|                                                                                       | Total function words                 | /         | -4.26 | 758   | <.001 | -0.31 |
|                                                                                       | Feel                                 | touch     | -4.72 | 758   | <.001 | -0.34 |
|                                                                                       | Body                                 | hand      | -4.70 | 758   | <.001 | -0.34 |
|                                                                                       | Second pers singular                 | you       | -4.87 | 758   | <.001 | -0.35 |
|                                                                                       | Signal words for future<br>tense     | tomorrow  | -5.42 | 758   | <.001 | -0.39 |
|                                                                                       | Fillers                              | I mean    | -5.65 | 758   | <.001 | -0.41 |
|                                                                                       | Inhibition                           | block     | -5.74 | 758   | <.001 | -0.42 |
|                                                                                       | Perceptual processes                 | observing | -5.83 | 758   | <.001 | -0.42 |
|                                                                                       | Causation                            | because   | -5.97 | 758   | <.001 | -0.43 |
| Health                                                                                | clinic                               | -6.29     | 758   | <.001 | -0.46 |       |
| Impersonal pronouns                                                                   | it                                   | -6.81     | 758   | <.001 | -0.49 |       |
| Humans                                                                                | adult                                | -6.78     | 758   | <.001 | -0.49 |       |

|                                                                         |                                |         |        |     |       |       |
|-------------------------------------------------------------------------|--------------------------------|---------|--------|-----|-------|-------|
|                                                                         | Signal words for past tense    | ago     | -7.50  | 758 | <.001 | -0.54 |
|                                                                         | Motion                         | arrive  | -7.56  | 758 | <.001 | -0.55 |
|                                                                         | Work                           | job     | -7.53  | 758 | <.001 | -0.55 |
|                                                                         | Signal words for present tense | often   | -7.75  | 758 | <.001 | -0.56 |
|                                                                         | First pers plural              | we      | -7.78  | 758 | <.001 | -0.57 |
|                                                                         | Insight                        | think   | -8.05  | 758 | <.001 | -0.58 |
|                                                                         | Religion                       | altar   | -7.99  | 758 | <.001 | -0.58 |
|                                                                         | Words per sentence             | /       | -8.11  | 758 | <.001 | -0.59 |
|                                                                         | Numbers                        | second  | -8.38  | 758 | <.001 | -0.61 |
|                                                                         | Certainty                      | always  | -8.42  | 758 | <.001 | -0.61 |
|                                                                         | Achievement                    | hero    | -8.71  | 758 | <.001 | -0.63 |
|                                                                         | Positive emotion               | love    | -8.99  | 758 | <.001 | -0.65 |
|                                                                         | Biological processes           | pain    | -9.16  | 758 | <.001 | -0.67 |
|                                                                         | Word count                     | /       | -10.46 | 758 | <.001 | -0.76 |
|                                                                         | Space                          | down    | -11.82 | 758 | <.001 | -0.86 |
|                                                                         | Social processes               | mate    | -13.84 | 758 | <.001 | -1.01 |
|                                                                         | First pers singular            | me      | -14.19 | 758 | <.001 | -1.03 |
|                                                                         | Personal pronouns              | them    | -17.03 | 758 | <.001 | -1.24 |
|                                                                         | Total pronouns                 | itself  | -19.43 | 758 | <.001 | -1.41 |
| Glorified stigma (depression)<br>vs<br>Glorified stigma (schizophrenia) | Friends                        | buddy   | 4.35   | 226 | <.001 | 0.58  |
|                                                                         | Second pers singular           | you     | 4.20   | 226 | <.001 | 0.56  |
|                                                                         | Discrepancy                    | should  | 3.81   | 226 | <.001 | 0.51  |
|                                                                         | Certainty                      | always  | 2.68   | 226 | .008  | 0.36  |
|                                                                         | Auxiliary verbs                | will    | 2.59   | 226 | .01   | 0.34  |
|                                                                         | Death                          | kill    | 2.59   | 226 | .01   | 0.34  |
|                                                                         | Fillers                        | I mean  | 2.52   | 226 | .01   | 0.34  |
|                                                                         | Time                           | until   | 2.19   | 226 | .03   | 0.29  |
|                                                                         | Achievement                    | hero    | -2.05  | 226 | .04   | -0.27 |
|                                                                         | Motion                         | arrive  | -2.25  | 226 | .03   | -0.30 |
|                                                                         | Prepositions                   | to      | -2.30  | 226 | .02   | -0.31 |
|                                                                         | Causation                      | because | -2.39  | 226 | .02   | -0.32 |
|                                                                         | Affective processes            | abandon | -2.58  | 226 | .01   | -0.34 |
|                                                                         | Assent                         | agree   | -2.60  | 226 | .01   | -0.35 |
|                                                                         | Signal words for tenses        | already | -3.20  | 226 | .002  | -0.43 |

|  |                             |       |       |     |       |       |
|--|-----------------------------|-------|-------|-----|-------|-------|
|  | Positive emotion            | love  | -3.26 | 226 | .001  | -0.43 |
|  | Signal words for past tense | ago   | -4.35 | 226 | <.001 | -0.58 |
|  | Humans                      | adult | -5.49 | 226 | <.001 | -0.73 |
|  | Word count                  | /     | -5.75 | 226 | <.001 | -0.76 |
